# Supplementary material
Source: publisher figshare collection journal article supplement (https://acs.figshare.com/ndownloader/files/4528831)
Supplement: Supplementary file 1 [file 4528831]

## *Supporting Information*

### **Assembly of 3D Metal-Organic Frameworks Based on Different Helical Units: Chiral and Achiral Structures Constructed by Length-Modulated N-donor Ligands**

Shun-Li Li, Ya-Qian Lan, Jun-Sheng Qin, Jian-Fang Ma\*, Jie Liu, and Jin Yang

*Key Lab of Polyoxometalate Science, Department of Chemistry, Northeast Normal  
University, Changchun 130024, People's Republic of China*

\* Corresponding author.

E-mail: jianfangma@yahoo.com.cn

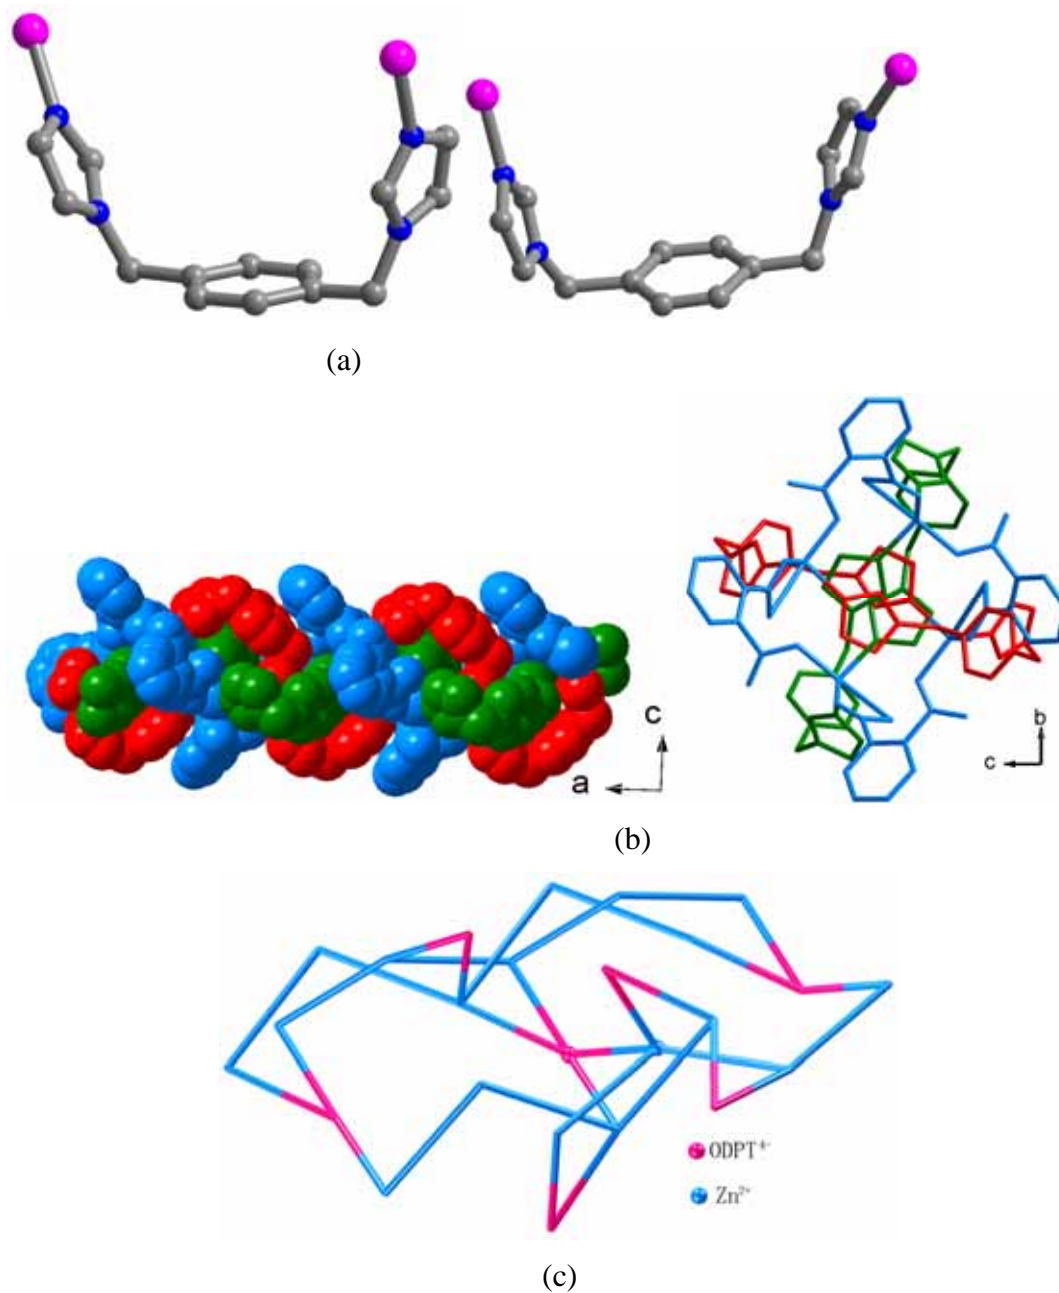

Figure S1 (a) The coordination modes of two kinds of  $L^1$  ligands in **1**. (b) Space-filling representation of the subunit formed by three kinds of chains entangling together along the crystallographic  $b$  axis (left) and stick representation of it along the crystallographic  $a$  axis (right). (c) A schematic view of the 3D network of **1**.

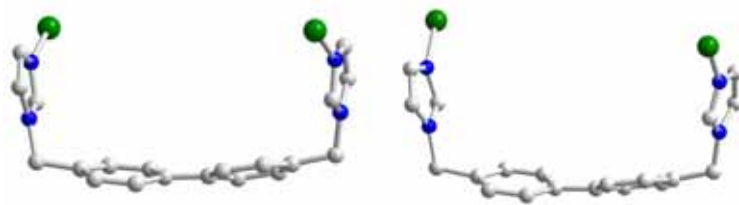

(a)

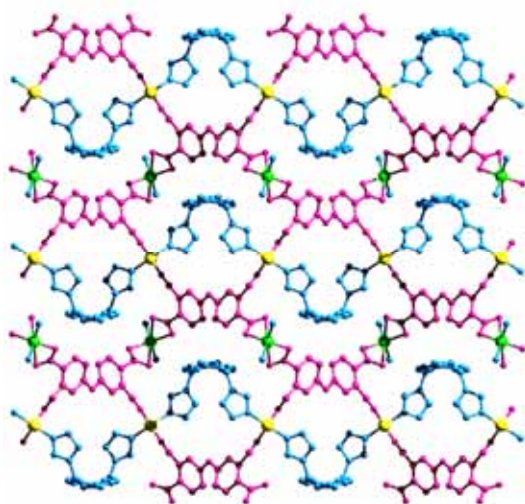

(b)

Figure S2 (a) The coordination mode of  $L^2$  in **2**. (b) Ball-stick representation the 2D layer formed by  $L^2$ a,  $ODPT^{4-}$  and Zn cations.

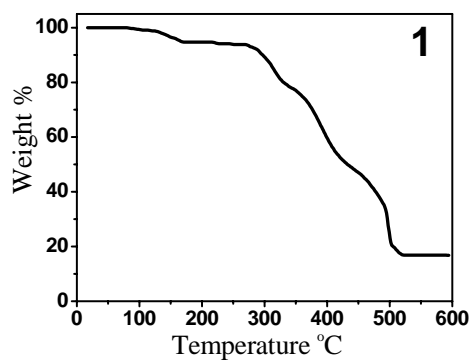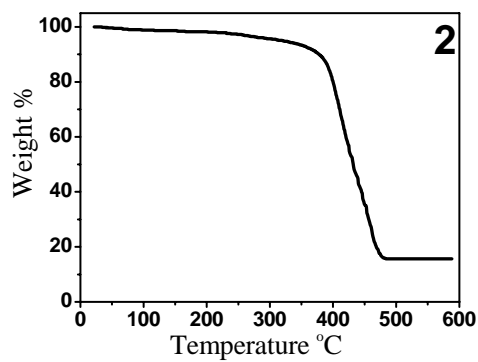

Figure S3 TGA of compounds **1** and **2**.
